# Supplementary material for: QPCTL Affects the Daily Weight Gain of the F2 Population and Regulates Myogenic Cell Proliferation and Differentiation in Chickens
Source: MDPI journal article supplement (doi:10.3390/ani12243535), 2022-12-14
Supplement: s1 [file s1]

# *QPCTL* Affects the Daily Weight Gain of the F2 Population and Regulates Myogenic Cell Proliferation and Differentiation in Chickens

Tuanhui Ren<sup>1,2,3</sup>, Xiuxian Yang<sup>1,2</sup>, Wujian Lin<sup>1,2</sup>, Zihao Zhang<sup>1,2</sup>, Shizi He<sup>1,2</sup>, Wangyu Li<sup>1,2</sup>,  
Zhuanjian Li<sup>3\*</sup>, Xiquan Zhang<sup>1,2\*</sup>

1.Department of Animal Genetics, Breeding and Reproduction, College of Animal Science, South China Agricultural University, Guangzhou 510642, China;

2.Guangdong Provincial Key Lab of Agro-Animal Genomics and Molecular Breeding, Key Laboratory of Chicken Genetics Breeding and Reproduction, Ministry of Agriculture, Guangzhou 510642, China;

3.College of Animal Science and Technology, Henan Agricultural University, Zhengzhou 450046, China.

\* **Correspondence:** lizhuanjian@163.com (Z.L.); xqzhang@scau.edu.cn (X.Z.)

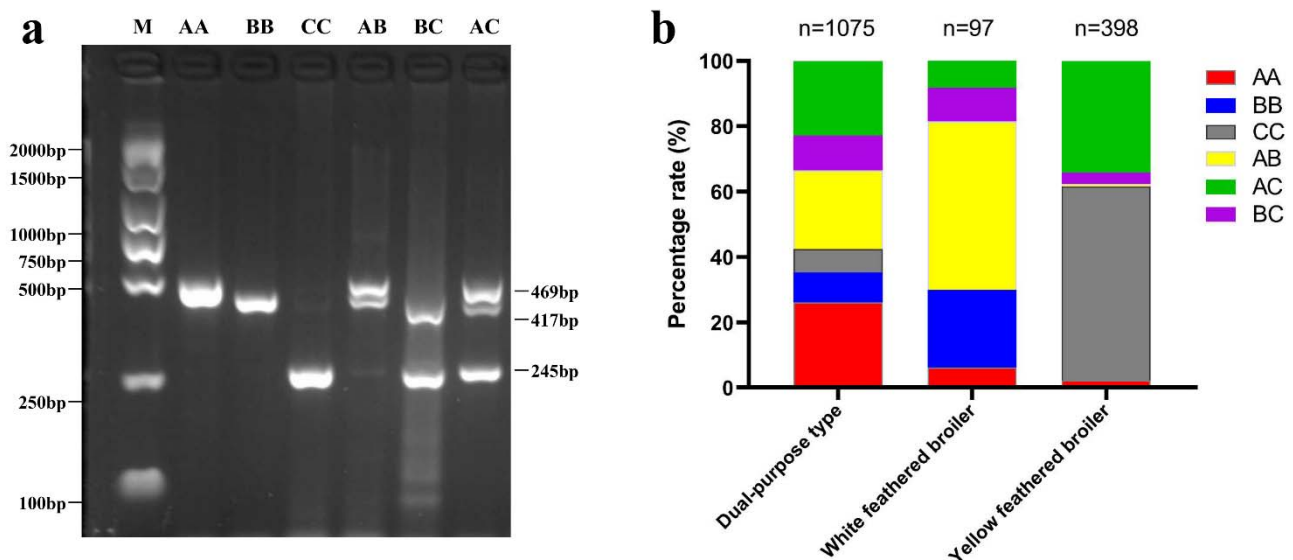

**Figure S1.** (a) Electrophoresis (2.5%) patterns showing the amplification results for *QPCTL* gene. AA, BB, CC, AB, AC and BC are the six different genotypes, and M represents BM2000. (b) Percentage of different genotypes in the different populations. Dual-purpose type (Gushi (female,  $n = 143$ ), Lushi (female,  $n = 192$ ), Changshun (female,  $n = 135$ ), Xichuan (female,  $n = 323$ ), A line (female,  $n = 29$ ), D line (female,  $n = 30$ ), H line (female,  $n = 26$ ), M line (female,  $n = 30$ ), 103 line dwarf chicken (female,  $n = 48$ ), Xinghua dwarf chicken (female,  $n = 48$ ) and Yellow dwarf chicken (female,  $n = 71$ )), white feathered broilers (Recessive White Rock chicken (male,  $n = 57$ ) and Arbor Acres chicken (male,  $n = 40$ )), and yellow feathered broilers (Ma-Huang chicken (male,  $n = 398$ )). A line, D line, H line and M line all from Gushi chicken hybrid lines, 103 line dwarf chicken, Xinghua dwarf chicken and Yellow dwarf chicken all from dwarf chicken hybrid lines.

**Table S1.** Details of primer pairs.

| Gene name                       | Primer sequences (5'-3')                              | Sizes (bp)    |
|---------------------------------|-------------------------------------------------------|---------------|
| <i>QPCTL</i>                    | F: GCGTGTCACCTACGACACCAA<br>R: CTTCTCCATCCAGGAACAGC   | 193           |
| <i>Cyclin D1</i>                | F: CAGAAGTGCGAAGAGGAAGT<br>R: CTGATGGAGTTGTCGGTGTA    | 188           |
| <i>Cyclin D2</i>                | F: AACTTGCTCTACGACGACC<br>R: TTCACAGACCTCCAACATC      | 150           |
| <i>Cyclin B2</i>                | F: CAGTAAAGGCTACGAAAG<br>R: ACATCCATAGGGACAGG         | 133           |
| <i>MYHC</i>                     | F: CTCCTCACGCTTTGGTAA<br>R: TGATAGTCGTATGGGTTGGT      | 213           |
| <i>MYOD</i>                     | F: GCTACTACACGGAATCACCAAAT<br>R: CTGGGCTCCACTGTCACTCA | 200           |
| <i>MYOG</i>                     | F: CGGAGGCTGAAGAAGGTGAA<br>R: CGGTCCTCTGCCTGGTCAT     | 320           |
| <i><math>\beta</math>-actin</i> | F: GACTGACCGCGTTACTCCCA<br>R: CCAACCATCACACCCTGATGTC  | 166           |
| <i>QPCTL</i> -Genotyping        | F: GACTGACCGCGTTACTCCCA<br>R: CCAACCATCACACCCTGATGTC  | 245, 417, 469 |

Note: Tm values of all primers were 60 °C; The primers of *QPCTL*, *Cyclin D1*, *Cyclin D2*, *Cyclin B2*, *MYHC*, *MYOD*, *MYOG* and  *$\beta$ -actin* were used for qRT-PCR, and the primers of *QPCTL*-Genotyping were used for Indels genotyping.
